# Supplementary figures and images for: A phthalimide- and diketopyrrolopyrrole-based A1–π–A2 conjugated polymer for high-performance organic thin-film transistors
Source: Royal Society of Chemistry journal article supplement (doi:10.1039/c4py00916a), 2014-09-18

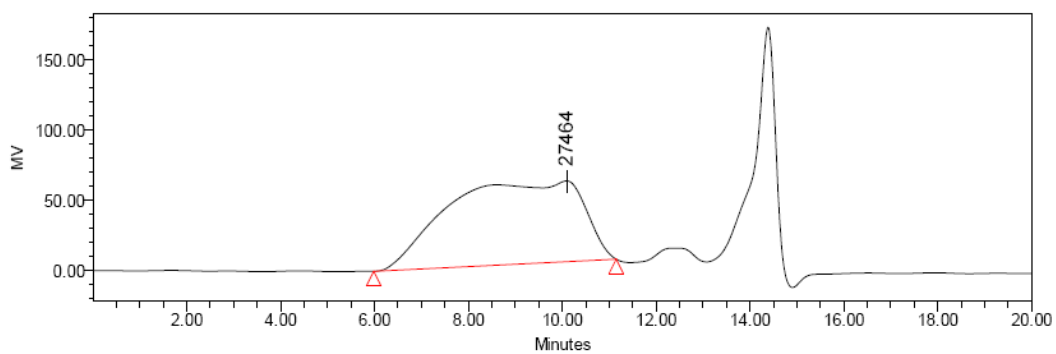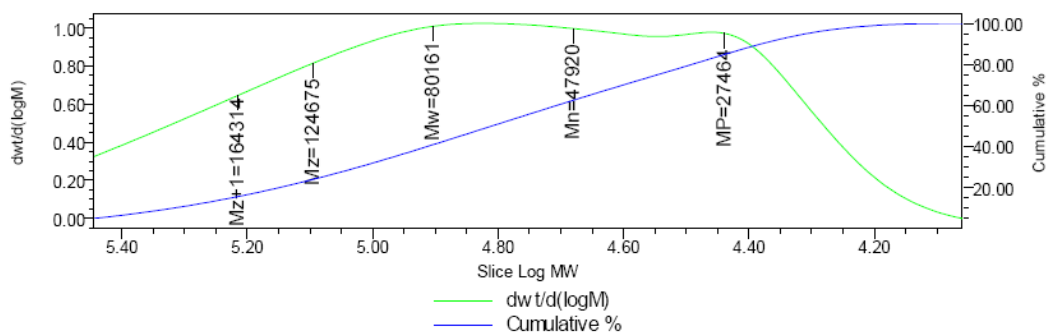

GPC Sample Results

|   | Retention Time | Mn    | Mw    | MP    | Mz     | Poly-dispersity |
|---|----------------|-------|-------|-------|--------|-----------------|
| 1 | 10.092         | 47920 | 80161 | 27464 | 124675 | 1.673           |

Supplement: c4py00916a1.pdf [file c4py00916a1.pdf]
